# Supplementary material for: Spatial and Temporal Association of Outbreaks of H5N1 Influenza Virus Infection in Wild Birds with the 0°C Isotherm
Source: PubMed Central journal article supplement (PMC2851735; doi:10.1371/journal.ppat.1000854), 2010-04-08
Supplement: ppat.1000854.s002.pdf [file ppat.1000854.s002.pdf]

**Table S1**

Locations and dates of initial outbreaks of HPAIV H5N1 infection in wild birds in Europe during the winter of 2005-2006 [31]; in chronological order.

| <b>Country</b>         | <b>Latitude</b> | <b>Longitude</b> | <b>Date</b> |
|------------------------|-----------------|------------------|-------------|
| Croatia                | 45.57           | 17.94            | 19-oct-05   |
| Croatia                | 45.65           | 18.18            | 19-nov-05   |
| Greece                 | 40.27           | 22.58            | 30-jan-06   |
| Bulgaria               | 43.76           | 22.71            | 31-jan-06   |
| Italy                  | 37.45           | 14.15            | 1-feb-06    |
| Greece                 | 38.93           | 24.55            | 3-feb-06    |
| Greece                 | 40.63           | 27.95            | 3-feb-06    |
| Greece                 | 40.97           | 25.15            | 6-feb-06    |
| Italy                  | 38.88           | 16.42            | 6-feb-06    |
| Germany                | 54.63           | 13.23            | 8-feb-06    |
| Slovenia               | 46.36           | 15.40            | 9-feb-06    |
| Italy                  | 40.87           | 16.60            | 14-feb-06   |
| Bosnia and Herzegovina | 44.35           | 17.19            | 16-feb-06   |
| Slovakia               | 48.10           | 17.34            | 17-feb-06   |
| Italy                  | 42.83           | 12.53            | 19-feb-06   |
| Germany                | 47.67           | 11.50            | 20-feb-06   |
| Germany                | 48.88           | 12.59            | 20-feb-06   |
| Germany                | 49.64           | 10.90            | 20-feb-06   |
| Germany                | 52.95           | 9.91             | 20-feb-06   |
| Croatia                | 43.51           | 16.24            | 21-feb-06   |
| France                 | 45.98           | 4.98             | 26-feb-06   |
| France                 | 43.45           | 5.01             | 28-feb-06   |
| France                 | 46.26           | 6.08             | 28-feb-06   |
| Poland                 | 52.24           | 15.47            | 1-mar-06    |
| Poland                 | 53.64           | 16.16            | 2-mar-06    |
| Croatia                | 45.83           | 18.79            | 3-mar-06    |
| Serbia and Montenegro  | 44.12           | 19.51            | 4-mar-06    |
| Germany                | 47.91           | 12.11            | 5-mar-06    |
| Germany                | 48.03           | 10.86            | 5-mar-06    |
| Switzerland            | 47.69           | 8.64             | 6-mar-06    |
| Slovenia               | 46.57           | 15.62            | 10-mar-06   |
| Denmark                | 55.12           | 11.81            | 12-mar-06   |
| Germany                | 53.22           | 13.81            | 14-mar-06   |
| Germany                | 53.96           | 9.51             | 17-mar-06   |
| Germany                | 54.02           | 12.08            | 17-mar-06   |
| Germany                | 54.35           | 13.37            | 17-mar-06   |
| Germany                | 47.59           | 9.68             | 18-mar-06   |
| Czech Republic         | 49.05           | 14.43            | 20-mar-06   |
| Denmark                | 55.97           | 9.77             | 24-mar-06   |
| Germany                | 49.34           | 12.23            | 24-mar-06   |
| Germany                | 49.43           | 11.06            | 24-mar-06   |
| Denmark                | 54.86           | 9.99             | 25-mar-06   |
| Denmark                | 55.25           | 14.74            | 26-mar-06   |
| Denmark                | 55.25           | 11.27            | 27-mar-06   |
| Germany                | 48.88           | 12.59            | 27-mar-06   |

|         |       |       |           |
|---------|-------|-------|-----------|
| Germany | 53.77 | 11.27 | 27-mar-06 |
| Poland  | 53.26 | 18.26 | 27-mar-06 |
| UK      | 56.22 | -2.73 | 30-mar-06 |
| Germany | 49.49 | 8.51  | 31-mar-06 |
| Germany | 49.54 | 10.43 | 31-mar-06 |
| Germany | 52.53 | 13.36 | 31-mar-06 |
| Germany | 54.22 | 9.77  | 31-mar-06 |
