# Supplementary material for: Spatial and Temporal Association of Outbreaks of H5N1 Influenza Virus Infection in Wild Birds with the 0°C Isotherm
Source: PubMed Central journal article supplement (PMC2851735; doi:10.1371/journal.ppat.1000854), 2010-04-08
Supplement: ppat.1000854.s003.pdf [file ppat.1000854.s003.pdf]

**Table S2**

Locations of maximum mallard counts obtained at each of 93 locations across Europe between 1990 and 2003 [32], and locations of mid-January waterbird counts obtained in Rhône-Alpes (eastern France) between 1993 and 2008, and in Switzerland between 2002 and 2007 (available online at <http://coraregion.free.fr> and [www.vogelwarte.ch](http://www.vogelwarte.ch), respectively). IWC: International Waterbird Census

| <b>Country</b>      | <b>IWC site</b>                         | <b>Latitude</b> | <b>Longitude</b> | <b>Year</b> |
|---------------------|-----------------------------------------|-----------------|------------------|-------------|
| Croatia             | Dunav: Batina                           | 45.87           | 18.83            | 1990        |
| Germ./Switz./Austr. | Bodensee Gesamt                         | 47.59           | 9.47             | 1990        |
| Germany             | Rhein: Breisach - Nonnerweir            | 48.03           | 7.58             | 1990        |
| Germany             | Rhein: Nonnenweier-Kehl                 | 48.35           | 7.76             | 1990        |
| Germany             | Stausee Dachwig                         | 51.08           | 10.86            | 1990        |
| Germany             | Talsperre Spremberg                     | 51.65           | 14.41            | 1990        |
| Hungary             | Bugyi                                   | 47.23           | 19.15            | 1990        |
| Romania             | Lake Sinoe                              | 44.58           | 28.83            | 1990        |
| Spain               | Laguna de Gallocanta (Z)                | 41.00           | -1.51            | 1990        |
| Ukraine             | Black Sea                               | 46.48           | 30.76            | 1990        |
| Ukraine             | Cherkassi (Region)                      | 49.41           | 32.06            | 1990        |
| Ukraine             | Crimea (Region)                         | 44.93           | 34.10            | 1990        |
| Ukraine             | Poltava (Region)                        | 49.59           | 34.55            | 1990        |
| Denmark             | Danish Wadden Sea                       | 55.47           | 8.45             | 1991        |
| Denmark             | Lolland NW                              | 54.73           | 11.46            | 1991        |
| Germany             | Weser: Strohouse Plate                  | 53.67           | 8.39             | 1991        |
| Romania             | Golesti                                 | 45.66           | 27.16            | 1991        |
| Ukraine             | Sasyk Liman                             | 45.18           | 33.50            | 1991        |
| Croatia             | Ribnjacarstvo (Slavonski Brod Fishpond) | 45.16           | 18.02            | 1992        |
| Germany             | Elbe Km                                 | 51.15           | 13.71            | 1992        |
| Germany             | Rhein: Weil-Breisach                    | 50.31           | 8.42             | 1992        |
| Hungary             | Duna 02:00 Baja-Dunafoldvar             | 46.18           | 18.95            | 1992        |
| Italy               | Laguna D Di Grado E marano              | 45.71           | 13.35            | 1992        |
| Spain               | Tablas de Daimiel (Cr)                  | 39.12           | -3.74            | 1992        |
| Ukraine             | Vinitsa (Region)                        | 49.23           | 28.49            | 1992        |
| Bulgaria            | Garvanovo Dam                           | 41.97           | 25.45            | 1993        |
| Germany             | Wieck-Kooser See                        | 54.15           | 13.40            | 1993        |
| Hungary             | Soponyai-Halastavak                     | 47.01           | 18.46            | 1993        |
| Netherlands         | Eemmeer. Nijkerkernauw en Nuldernauw    | 52.25           | 5.43             | 1993        |
| Poland              | Odra: Krzepkowice-Brzeg Dolny           | 50.47           | 17.97            | 1993        |
| Ukraine             | Donetsk (Region)                        | 48.03           | 37.75            | 1993        |
| Ukraine             | Zaporozhye (Region)                     | 47.84           | 35.17            | 1993        |
| Czech Republic      | Nove Mlyny I & lidam Systems            | 48.86           | 16.73            | 1994        |
| Hungary             | Csaj. Pusztaszter (Halasto)=Tomorkeny   | 46.61           | 20.04            | 1994        |
| Hungary             | Hortobagy Halasto                       | 47.58           | 21.15            | 1994        |

|                |                                                |       |       |      |
|----------------|------------------------------------------------|-------|-------|------|
| Romania        | Delta Dunarii (Danube)                         | 45.19 | 29.27 | 1994 |
| Slovakia       | Zemplinska Sirava reservoir                    | 48.79 | 22.01 | 1994 |
| Spain          | Aiguamolls de l'emporda (Gi)                   | 42.22 | 3.11  | 1994 |
| Ukraine        | Dnepropetrovsk (Region)                        | 48.42 | 35.14 | 1994 |
| Ukraine        | Kharkov (Region)                               | 49.99 | 36.26 | 1994 |
| Ukraine        | Kherson (Region)                               | 46.70 | 32.66 | 1994 |
| Czech Republic | Nechranice Dam                                 | 50.37 | 13.42 | 1995 |
| Germany        | Vorland Jadebusen                              | 53.48 | 8.22  | 1995 |
| Greece         | Karla Reservoirs                               | 39.44 | 22.79 | 1995 |
| Greece         | Kerkini                                        | 41.22 | 23.09 | 1995 |
| Romania        | Strejesti                                      | 44.53 | 24.27 | 1995 |
| Hungary        | Balaton: Total                                 | 48.10 | 20.32 | 1996 |
| Hungary        | Sumony Halasto                                 | 45.97 | 17.92 | 1996 |
| Poland         | Zbiornik Dzierzno                              | 53.92 | 19.35 | 1996 |
| Serbia         | Jazovo Fish Pond                               | 45.89 | 20.23 | 1996 |
| Ukraine        | Lake Kitai                                     | 45.35 | 33.16 | 1996 |
| Bulgaria       | Shabla Lake (+ Ezeretz)                        | 43.57 | 28.57 | 1997 |
| Yugoslavia     | Uzdin-Idvor-Sakule                             | 45.20 | 20.63 | 1997 |
| Croatia        | Kopacki Rit                                    | 45.63 | 18.89 | 1998 |
| Germany        | Dümmer                                         | 53.57 | 11.21 | 1998 |
| Bulgaria       | Danube: Russe-Tutrakan                         | 43.85 | 25.95 | 1999 |
| Bulgaria       | Danube: Tutrakan-Silistra                      | 44.12 | 27.26 | 1999 |
| Croatia        | Park Prirode Lonjsko Polje                     | 45.42 | 16.65 | 1999 |
| Greece         | Axios, Loudias & Aliakmon Deltas               | 40.68 | 22.54 | 1999 |
| Hungary        | Biharugrai Halasto                             | 46.97 | 21.60 | 1999 |
| Netherlands    | Grevelingen                                    | 51.76 | 3.92  | 1999 |
| Netherlands    | Groningse Noordkust                            | 53.49 | 6.56  | 1999 |
| Netherlands    | Hollands Diep                                  | 51.70 | 4.51  | 1999 |
| Netherlands    | Ijssel                                         | 52.27 | 6.03  | 1999 |
| Netherlands    | Ijsselmeer                                     | 52.80 | 5.32  | 1999 |
| Netherlands    | Tjeukemeer                                     | 52.96 | 5.83  | 1999 |
| Slovenia       | Drava: Ptuj                                    | 46.42 | 15.87 | 1999 |
| Ukraine        | Area Northeast of Odessa                       | 46.48 | 30.73 | 1999 |
| Belarus        | Minsk Town Waterbodies                         | 53.97 | 27.58 | 2000 |
| Bulgaria       | Durankulak Lake                                | 43.66 | 28.55 | 2000 |
| France         | Dombes-Vallée de l'Ain                         | 45.97 | 5.00  | 2000 |
| Greece         | Evros Delta                                    | 41.24 | 26.14 | 2000 |
| Hungary        | Duna 01:00 Orsz. Hatar (=Border)-Baja          | 47.68 | 17.64 | 2000 |
| Ukraine        | Secondary delta of the Kiliya Channel (Danube) | 45.45 | 29.26 | 2000 |
| Austria        | March                                          | 48.43 | 16.83 | 2001 |
| Netherlands    | Dollard                                        | 53.29 | 7.13  | 2001 |
| Netherlands    | Haringvliet                                    | 51.79 | 4.19  | 2001 |
| Netherlands    | Krimpenerwaard                                 | 51.98 | 4.78  | 2001 |
| Netherlands    | Markermeer                                     | 52.54 | 5.27  | 2001 |
| Netherlands    | Oosterschelde                                  | 51.64 | 3.84  | 2001 |
| Netherlands    | Texel                                          | 53.10 | 4.81  | 2001 |
| Netherlands    | Veerse Meer                                    | 51.53 | 3.69  | 2001 |
| Netherlands    | Westerschelde                                  | 51.38 | 3.87  | 2001 |
| France         | Baie de l'Aiguillon                            | 46.28 | -1.22 | 2002 |

|             |                                        |       |       |           |
|-------------|----------------------------------------|-------|-------|-----------|
| France      | La Camargue                            | 43.52 | 4.60  | 2002      |
| Germany     | Donau: Km                              | 48.60 | 10.86 | 2002      |
| Hungary     | Geszt. Begecsi Halastavak              | 47.44 | 21.32 | 2002      |
| Hungary     | Nagyhegyes Elepi-H.To                  | 47.54 | 21.35 | 2002      |
| Hungary     | Retszilas Halasto                      | 46.83 | 18.64 | 2002      |
| Italy       | Laguna Di Venezia                      | 45.34 | 12.28 | 2002      |
| France      | Etangs de la Brenne                    | 46.75 | 1.22  | 2003      |
| France      | Lac de Grandlieu                       | 47.10 | -1.68 | 2003      |
| Spain       | Parque Natural de la Alburfera         | 39.30 | -0.32 | 2003      |
| France      | Beauvoir                               | 45.12 | 5.34  | 1993-2008 |
| France      | Château-neuf Rocheмаure                | 44.59 | 4.71  | 1993-2008 |
| France      | Cordon Rhône: Villebois                | 45.85 | 5.43  | 1993-2008 |
| France      | Donzère Mondragon                      | 44.44 | 4.71  | 1993-2008 |
| France      | Etangs de la Dombes                    | 45.97 | 5.00  | 1993-2008 |
| France      | Etangs de la plaine du Forez           | 45.70 | 4.18  | 1993-2008 |
| France      | Grangent                               | 45.46 | 4.26  | 1993-2008 |
| France      | La Vanelle                             | 45.03 | 4.98  | 1993-2008 |
| France      | Lac d'Annecy                           | 45.86 | 6.17  | 1993-2008 |
| France      | Lac de Divonne les Bains               | 46.36 | 6.14  | 1993-2008 |
| France      | Lac de Machilly                        | 46.26 | 6.33  | 1993-2008 |
| France      | Lac du Bourget                         | 45.73 | 5.87  | 1993-2008 |
| France      | Léman français                         | 46.44 | 6.56  | 1993-2008 |
| France      | L'Etang de Bresse                      | 46.31 | 5.11  | 1993-2008 |
| France      | Miribel Jonage Grand Large             | 45.82 | 4.95  | 1993-2008 |
| France      | Pierre Bénite                          | 45.70 | 4.82  | 1993-2008 |
| France      | Printe-Garde                           | 44.80 | 4.78  | 1993-2008 |
| France      | Rhône, Seyssel                         | 45.96 | 5.83  | 1993-2008 |
| France      | Rhône, St Romain en Gal                | 45.54 | 4.86  | 1993-2008 |
| France      | Rhône: l'Etournel                      | 46.13 | 5.95  | 1993-2008 |
| France      | Roche de Glun                          | 45.01 | 4.84  | 1993-2008 |
| France      | Saône                                  | 46.08 | 4.81  | 1993-2008 |
| France      | St Nazaire en Royans                   | 45.06 | 5.25  | 1993-2008 |
| France      | Vallée de l'Ain et plans d'eau annexes | 46.05 | 5.34  | 1993-2008 |
| France      | Villerest                              | 45.99 | 4.04  | 1993-2008 |
| Switzerland | Aare: Biel-Olten                       | 47.21 | 7.53  | 2002-2007 |
| Switzerland | Aare: Wohlensee                        | 46.97 | 7.33  | 2002-2007 |
| Switzerland | Bielersee                              | 47.08 | 7.17  | 2002-2007 |
| Switzerland | Bodensee-Obersee                       | 47.65 | 9.18  | 2002-2007 |
| Switzerland | Bodensee-Untersee                      | 47.47 | 9.47  | 2002-2007 |
| Switzerland | Hallwilersee                           | 47.28 | 8.22  | 2002-2007 |
| Switzerland | Hochrhein: Aaermündung-Basel           | 47.56 | 7.58  | 2002-2007 |
| Switzerland | Hochrhein: Rheinklingen-Aaermündung    | 47.67 | 8.81  | 2002-2007 |
| Switzerland | Lac de Morat                           | 46.91 | 7.05  | 2002-2007 |
| Switzerland | Lac de Neuchâtel                       | 46.91 | 6.87  | 2002-2007 |
| Switzerland | Lac Léman                              | 46.44 | 6.56  | 2002-2007 |
| Switzerland | Limmat                                 | 47.44 | 8.39  | 2002-2007 |
| Switzerland | Reuss                                  | 47.27 | 8.32  | 2002-2007 |
| Switzerland | Rhône: an aval de Genève               | 46.20 | 6.14  | 2002-2007 |
| Switzerland | Thunersee                              | 46.68 | 7.72  | 2002-2007 |

|             |                   |       |      |           |
|-------------|-------------------|-------|------|-----------|
| Switzerland | Vierwaldsättersee | 46.99 | 8.34 | 2002-2007 |
| Switzerland | Zugersee          | 47.13 | 8.49 | 2002-2007 |
| Switzerland | Zurichsee         | 47.22 | 8.75 | 2002-2007 |
